# Supplementary material
Source: MDPI journal article supplement (https://www.mdpi.com/2076-3417/12/7/3590)
Supplement: s1 [file s1]

**Table S1.** Experimental mixtures used in the trial campaigns at 900 °C and 1100 °C, base addition of the respective chlorides represents the approximate 2-fold of the stoichiometric demand of chlorine

|                            |                      | Chlorination Agent                   |       |                 |                                      |       |                |                                      |       |                |                 |
|----------------------------|----------------------|--------------------------------------|-------|-----------------|--------------------------------------|-------|----------------|--------------------------------------|-------|----------------|-----------------|
|                            |                      | AlCl <sub>3</sub> ·6H <sub>2</sub> O |       |                 | FeCl <sub>3</sub> ·6H <sub>2</sub> O |       |                | MgCl <sub>2</sub> ·6H <sub>2</sub> O |       |                |                 |
|                            |                      | CA/R Ratio                           | b. a. | 2-fold of b. a. | 3-fold of b. a.                      | b. a. | 2-fold of b. a | 3-fold of b. a.                      | b. a. | 2-fold of b. a | 3-fold of b. a. |
| Iron precipitation residue | Zn-Jarosite          | R [g]                                | 51.13 | 37.58           | 29.70                                | 49.02 | 35.34          | 27.62                                | 46.70 | 32.98          | 25.49           |
|                            |                      | CA[g]                                | 28.87 | 42.42           | 50.30                                | 30.98 | 44.66          | 52.38                                | 33.30 | 47.02          | 54.51           |
|                            | Zn-Goethite          | R [g]                                | 47.46 | 33.74           | 26.17                                | 45.26 | 31.55          | 24.22                                | 42.87 | 29.28          | 22.23           |
|                            |                      | CA[g]                                | 32.54 | 46.26           | 53.83                                | 34.74 | 48.45          | 55.78                                | 37.13 | 50.72          | 57.77           |
|                            | Ni-Jarosite          | R [g]                                | 58.58 | 46.20           | 38.15                                | 56.76 | 43.98          | 35.90                                | 54.72 | 41.58          | 33.53           |
|                            |                      | CA[g]                                | 21.42 | 33.80           | 41.85                                | 23.24 | 36.02          | 44.10                                | 25.28 | 38.42          | 46.47           |
|                            | Zn-Jarosite calcined | R [g]                                | 39.48 | 26.21           | 19.61                                | 37.23 | 24.26          | 17.99                                | 34.84 | 22.27          | 16.36           |
|                            |                      | CA[g]                                | 40.52 | 53.79           | 60.39                                | 42.77 | 55.74          | 62.01                                | 45.16 | 57.73          | 63.64           |
|                            | Zn-Goethite calcined | R [g]                                | 41.77 | 28.27           | 21.36                                | 39.52 | 26.24          | 19.64                                | 37.11 | 24.16          | 17.91           |
|                            |                      | CA[g]                                | 38.23 | 51.73           | 58.64                                | 40.48 | 53.76          | 60.36                                | 42.89 | 55.84          | 62.09           |
|                            | Ni-Jarosite          | R [g]                                | 49.54 | 35.88           | 28.13                                | 47.39 | 33.66          | 26.10                                | 45.04 | 31.34          | 24.03           |
|                            | calcined             | CA[g]                                | 30.46 | 44.12           | 51.87                                | 32.61 | 46.34          | 53.90                                | 34.96 | 48.66          | 55.97           |
